# Supplementary material
Source: publisher figshare collection journal article supplement (https://acs.figshare.com/ndownloader/files/5069455)

## Supporting Information:

### **Suzuki Coupling Reaction of 1,6,7,12-Tetrabromoperylene Bisimide**

*Wenfeng Qiu, Shiyan Chen, Xiaobo Sun, Yunqi Liu\*, Daoben Zhu\**

*Organic Solids Laboratory, Institute of Chemistry, Chinese Academy of Sciences,  
Beijing 100080, People's Republic of China*

Email: liuyq@mail.iccas.ac.cn

#### **General Experimental Methods**

<sup>1</sup>H NMR and <sup>13</sup>C NMR were measured with Bruker 300 MHz or 400 MHz spectrometers. Mass spectra were recorded on AEI-MS50-MS spectrometer for EI MS and Bruker BIFLEXIII spectrometer for MALDI-TOF-MS. Elemental analysis was performed on Carlo-Erba-1106 instrument. Infrared spectra were determined with Pekin-Elmer Tensor 27 spectrometer. Electronic absorption spectra were measured on a Jasco V570 UV-vis spectrophotometer. The photoluminescence spectra were recorded on Jasco FP-6600 spectrofluometer. 2-Ethylhexylamine, tetrakis(triphenylphosphine)palladium, cesium fluoride, and phenylboronic acid were purchased from Acros. Dehydrated 1,2-dimethoxyethane (DME), toluene, THF and N,N-dimethylformamide (DMF) were freshly distilled before reactions with common treatment methods. Fluorescence quantum yields were determined by the optically dilute method with Rhodamine B in ethanol solution as reference (quantum yield: 0.70, using an excitation wavelength of 510 nm).

## Experimental Section

### Synthesis of 1,6,7,12-Tetrabromoperylene-3,4,9,10-tetracarboxylic acid bisanhydride **2**

A mixture of 19.6 g (50 mmol) perylene-3,4,9,10-tetracarboxylic acid bisanhydride, 220 mL 98 wt% sulfuric acid and 40 mL fuming sulfuric acid was stirred at room temperature for 12 h. The mixture was then heated to 80 °C and 0.31 g I<sub>2</sub> (1.2 mmol) was added. Subsequently, 5.4 mL (16.8 g, 105 mmol, 2.1 equiv.) Br<sub>2</sub> was added dropwise over 8 h and the reaction mixture was heated for 24 h at 80 °C. Then 0.31 g I<sub>2</sub> (1.2 mmol) was added and the reaction temperature was raised to 100 °C. 5.4 mL (16.8 g, 105 mmol, 2.1 equiv.) Br<sub>2</sub> was added dropwise over 12 h and the reaction mixture was heated for an additional 80 h at 100 °C. After being cooled to room temperature, the excess bromine was removed by a gentle stream of N<sub>2</sub> gas, and 80 g of ice was added slowly. The resultant precipitate was filtered through G4 funnel, washed with 200 mL 86 % sulfuric acid and a large amount of water until the filtrate became neutral. The solid residue was dried in a vacuum at 120 °C for 8 h to give 34.1 g (96 %) of a red-brown powder. The crude product was used directly in the later reaction without further purification. Due to its insolubility in organic solvents, only MS was recorded. MS (EI): m/z 708 (M<sup>+</sup>).

### Synthesis of N,N'-Di(2-ethylhexyl)-1,6,7,12-tetrabromoperylene-3,4,9,10-tetracarboxylic acid bisimide **3**

2-Ethylhexylamine (4.4 g, 34 mmol) was added to a mixture of 1,6,7,12-tetrabromoperylene-3,4,9,10-tetracarboxylic acid bisanhydride 4.0 g (5.6 mmol) and 100 mL propionic acid under N<sub>2</sub> atmosphere, the reaction mixture was stirred and heated at 140 °C for 4 h. After being cooled to room temperature, the solvent was removed by rotary evaporation, the crude product was purified by silica gel column chromatography with toluene as eluent to yield perylene bisimide product as a red-brown solid (5.0 g, 95%).

**3:** UV-vis (CHCl<sub>3</sub>): [ $\lambda_{\max}$  nm (log $\epsilon$ )] 529 (4.52), 499 (4.38), 439 (4.11). FT-IR (KBr, cm<sup>-1</sup>)  $\nu$  3055, 2958, 2927, 2859, 1705 (s, C=O), 1663 (s, C=O), 1582, 1436, 1411, 1384, 1363, 1278, 1232, 1180, 1154, 925, 804, 646. MS (MALDI-TOF): m/z 930.3 (M<sup>+</sup>). <sup>1</sup>H NMR (400 MHz, CDCl<sub>3</sub>, 25 °C):  $\delta$  = 8.83 (s, 4H, perylene-H), 4.10-4.20 (m, 4H, N-CH<sub>2</sub>-), 1.94 (m, 2H, -CH-), 1.33-1.41 (m, 16H, -CH<sub>2</sub>-), 0.95 (m, 12H, -CH<sub>3</sub>) ppm. <sup>13</sup>C NMR (100 MHz, CDCl<sub>3</sub>, 25 °C):  $\delta$  = 162.5 (C=O), 136.2, 131.6, 131.4, 124.0, 122.7, 44.6, 38.0, 30.7, 28.6, 24.0, 23.1, 14.2, 10.6 ppm.

Elemental analysis (%), calcd. for (C<sub>40</sub>H<sub>38</sub>Br<sub>4</sub>N<sub>2</sub>O<sub>4</sub>): C, 51.64; H, 4.12; N, 3.01; Found: C, 51.50; H, 4.24; N, 2.92. Fluorescence (CH<sub>2</sub>Cl<sub>2</sub>):  $\lambda_{\text{max}}$  566 nm, fluorescence quantum yield  $\Phi_f$  0.62.

#### Typical procedure of the coupling reaction with condition D.

A three-neck flask was charged with N,N'-di(2-ethylhexyl)-1,6,7,12-tetrabromoperylene-3,4,9,10-tetracarboxylic acid bisimide (420 mg, 0.45 mmol, 1 equiv.), phenylboronic acid (330 mg, 2.7 mmol, 6 equiv.), cesium fluoride (550 mg, 3.6 mmol, 8 equiv.), and silver(I) oxide (460 mg, 2.0 mmol, 4.4 equiv.), and the flask was evacuated and backfilled with nitrogen two times. Tetrakis(triphenylphosphine)palladium (52 mg, 0.045 mmol, 10% equiv.) was added with a gentle flow of nitrogen. The flask was evacuated and backfilled with nitrogen three times. Subsequently, DME (15 mL) was added by syringe. The flask was cooled to -78 °C and further evacuated and backfilled with nitrogen three times. Subsequently, the reaction mixture was stirred at 80°C for 24 h with vigorous stirring. After being cooled to room temperature, the crude product was purified by silica gel column chromatography with toluene as eluent. The first band was collected, removal of the solvent yielded 1,6,7,12-tetraphenylperylene bisimide as a blue-purple solid (195 mg, 47%). The second band was collected and characterized to be 1,6,7-triphenyl perylene bisimide as a red solid (126 mg, 33%).

#### N,N'-Di(2-ethylhexyl)-1,6,7,12-tetraphenylperylene-3,4,9,10-tetracarboxylic acid bisimide 4:

UV-vis (CHCl<sub>3</sub>): [ $\lambda_{\text{max}}$  nm (log $\epsilon$ )] 603 (4.36), 568 (4.24), 449 (4.16). FT-IR (KBr, cm<sup>-1</sup>)  $\nu$  3058, 2958, 2929, 2861, 1699 (s, C=O), 1660 (s, C=O), 1592, 1491, 1443, 1410, 1317, 1268, 1226, 1184, 1150, 1034, 912, 732, 697. MS (MALDI-TOF): m/z 919.3 (M<sup>+</sup>). <sup>1</sup>H NMR (300 MHz, CDCl<sub>3</sub>, 25 °C):  $\delta$  = 8.30 (s, 4H, perylene-H), 7.20 (m, 4H, Ph-H), 7.08 (s, br, 8H, Ph-H), 6.70 (m, 8H, Ph-H), 4.15 (d, 4H,  $J$  = 6.69 Hz, N-CH<sub>2</sub>-), 1.98 (s, br, 2H, -CH-), 1.25–1.46 (m, br, 16H, -CH<sub>2</sub>-), 0.96 (m, 12H, -CH<sub>3</sub>) ppm. <sup>13</sup>C NMR (75 MHz, CDCl<sub>3</sub>, 25 °C):  $\delta$  = 164.6 (C=O), 143.1, 140.9, 134.2, 132.3, 131.7, 130.8, 129.2, 128.0, 126.5, 122.7, 44.8, 38.6, 31.4, 31.2, 29.5, 29.1, 24.7, 24.6, 23.6, 14.7, 11.3, 11.0 ppm. Elemental analysis (%), calcd. for (C<sub>64</sub>H<sub>58</sub>N<sub>2</sub>O<sub>4</sub>): C, 83.63; H, 6.36; N, 3.05; Found: C, 83.17; H, 6.38; N, 3.22. Fluorescence (CH<sub>2</sub>Cl<sub>2</sub>):  $\lambda_{\text{max}}$  665 nm, fluorescence quantum yield  $\Phi_f$  0.29.

**N,N'-Di(2-ethylhexyl)-1,6,7-triphenylperylene-3,4,9,10-tetracarboxylic acid bisimide 5:**

UV-vis ( $\text{CHCl}_3$ ): [ $\lambda_{\text{max}}$  nm (log $\epsilon$ )] 579 (4.40), 549 (4.31), 428 (4.04). FT-IR (KBr,  $\text{cm}^{-1}$ )  $\nu$  3058, 2958, 2929, 2861, 1699 (s, C=O), 1660 (s, C=O), 1592, 1490, 1449, 1413, 1347, 1303, 1223, 1184, 1150, 912, 733, 696. MS (MALDI-TOF):  $m/z$  842.5 ( $\text{M}^+$ ).  $^1\text{H}$  NMR (300 MHz,  $\text{CDCl}_3$ , 25  $^\circ\text{C}$ ):  $\delta$  = 8.65 (s, 1H, perylene-H), 8.28 (d, 2H,  $J$  = 5.91 Hz, perylene-H), 8.16 (d, 1H,  $J$  = 7.86 Hz, perylene-H), 7.73 (d, 1H,  $J$  = 7.89 Hz, perylene-H), 7.48 (s, br, 2H, Ph-H), 6.90–7.30 (m, br, 9H, Ph-H), 6.80 (s, br, 2H, Ph-H), 6.61 (d, 2H,  $J$  = 6.72 Hz, Ph-H), 4.11–4.17 (m, 4H, N- $\text{CH}_2$ -), 1.95 (s, br, 2H, -CH-), 1.30–1.50 (s, br, 16H, - $\text{CH}_2$ -), 0.91 (t, 12H, - $\text{CH}_3$ ) ppm.  $^{13}\text{C}$  NMR (75 MHz,  $\text{CDCl}_3$ , 25  $^\circ\text{C}$ ):  $\delta$  = 164.6 (C=O), 164.5 (C=O), 143.8, 143.2, 142.6, 141.9, 141.2, 140.7, 135.2, 135.0, 134.7, 133.1, 132.8, 132.4, 130.9, 130.7, 130.6, 130.4, 130.3, 130.1, 129.7, 129.6, 129.1, 128.7, 128.6, 128.0, 127.6, 123.0, 122.9, 122.6, 122.0, 44.7, 38.5, 31.2, 29.4, 29.1, 24.7, 24.5, 23.6, 14.6, 11.3, 11.2, 11.1 ppm. Elemental analysis (%), calcd. for ( $\text{C}_{58}\text{H}_{54}\text{N}_2\text{O}_4$ ): C, 82.64; H, 6.46; N, 3.32; Found: C, 82.30; H, 6.41; N, 3.43. Fluorescence ( $\text{CH}_2\text{Cl}_2$ ):  $\lambda_{\text{max}}$  642 nm, fluorescence quantum yield  $\Phi_f$  0.39.

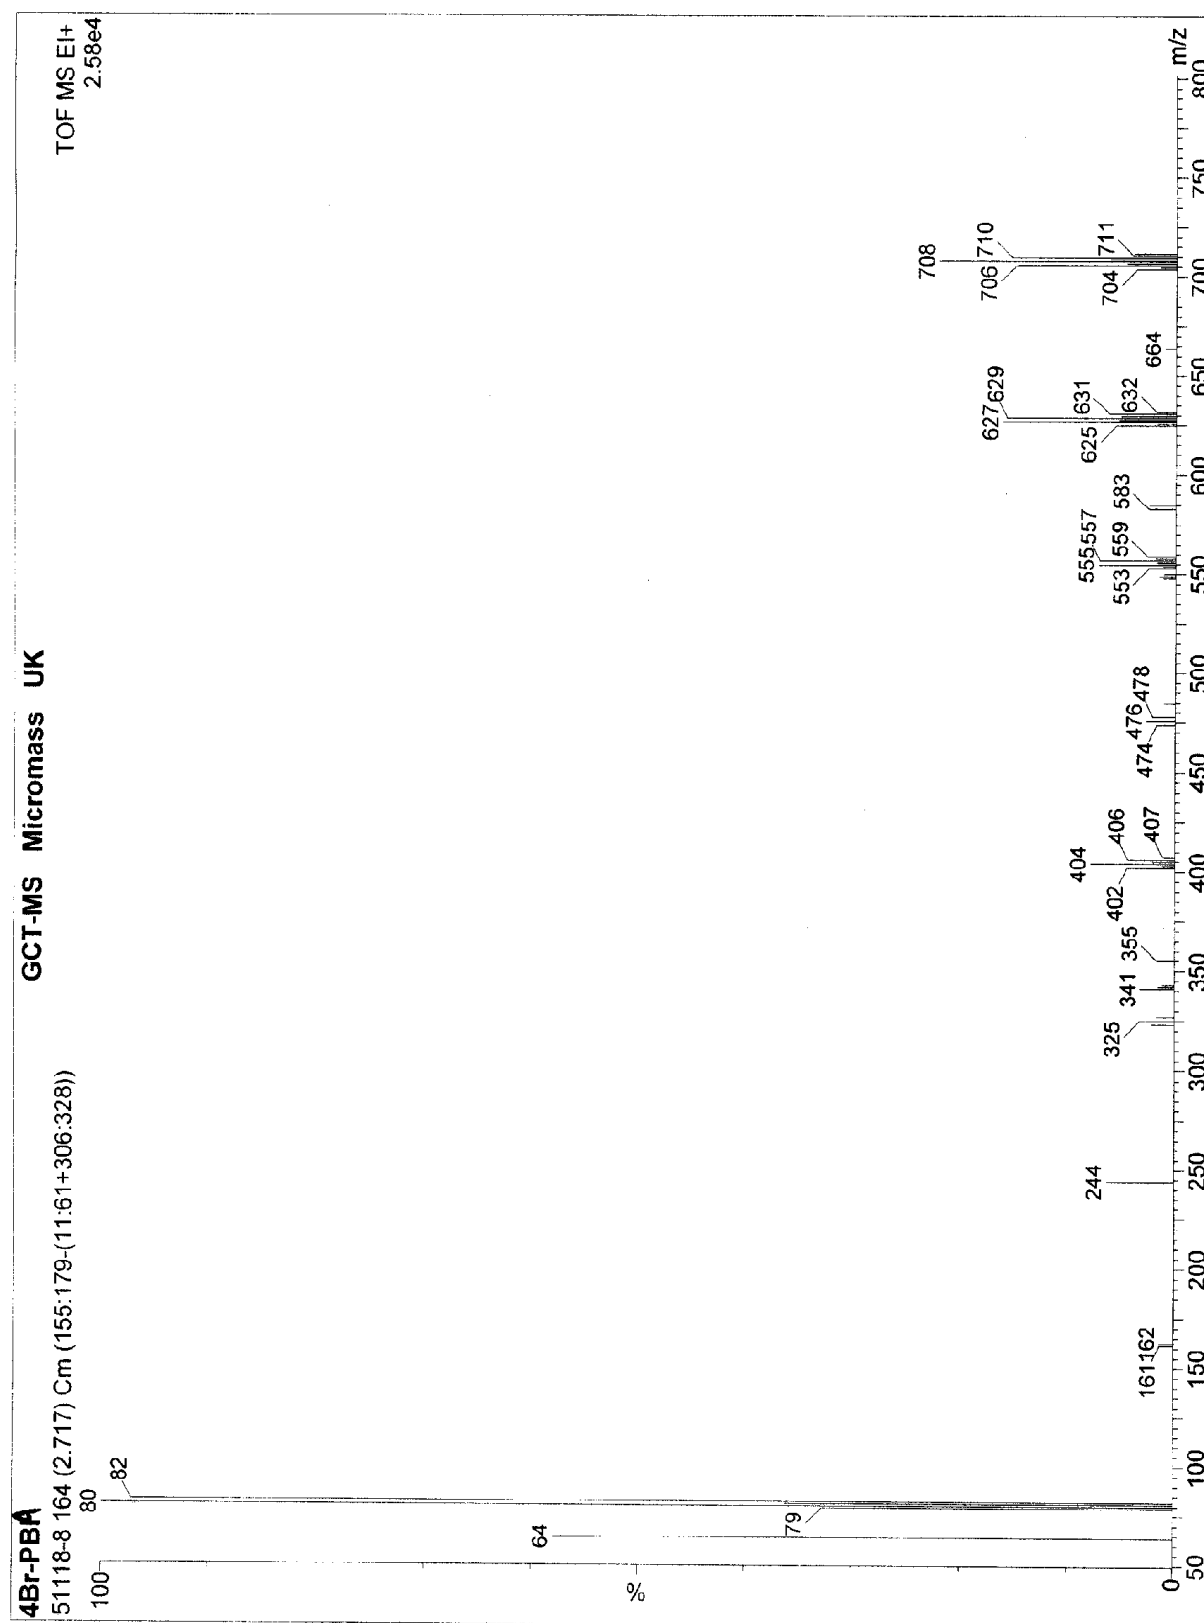

# <sup>1</sup>H NMR of **3** (400 MHz)

05-10-11-qiu-H77-1

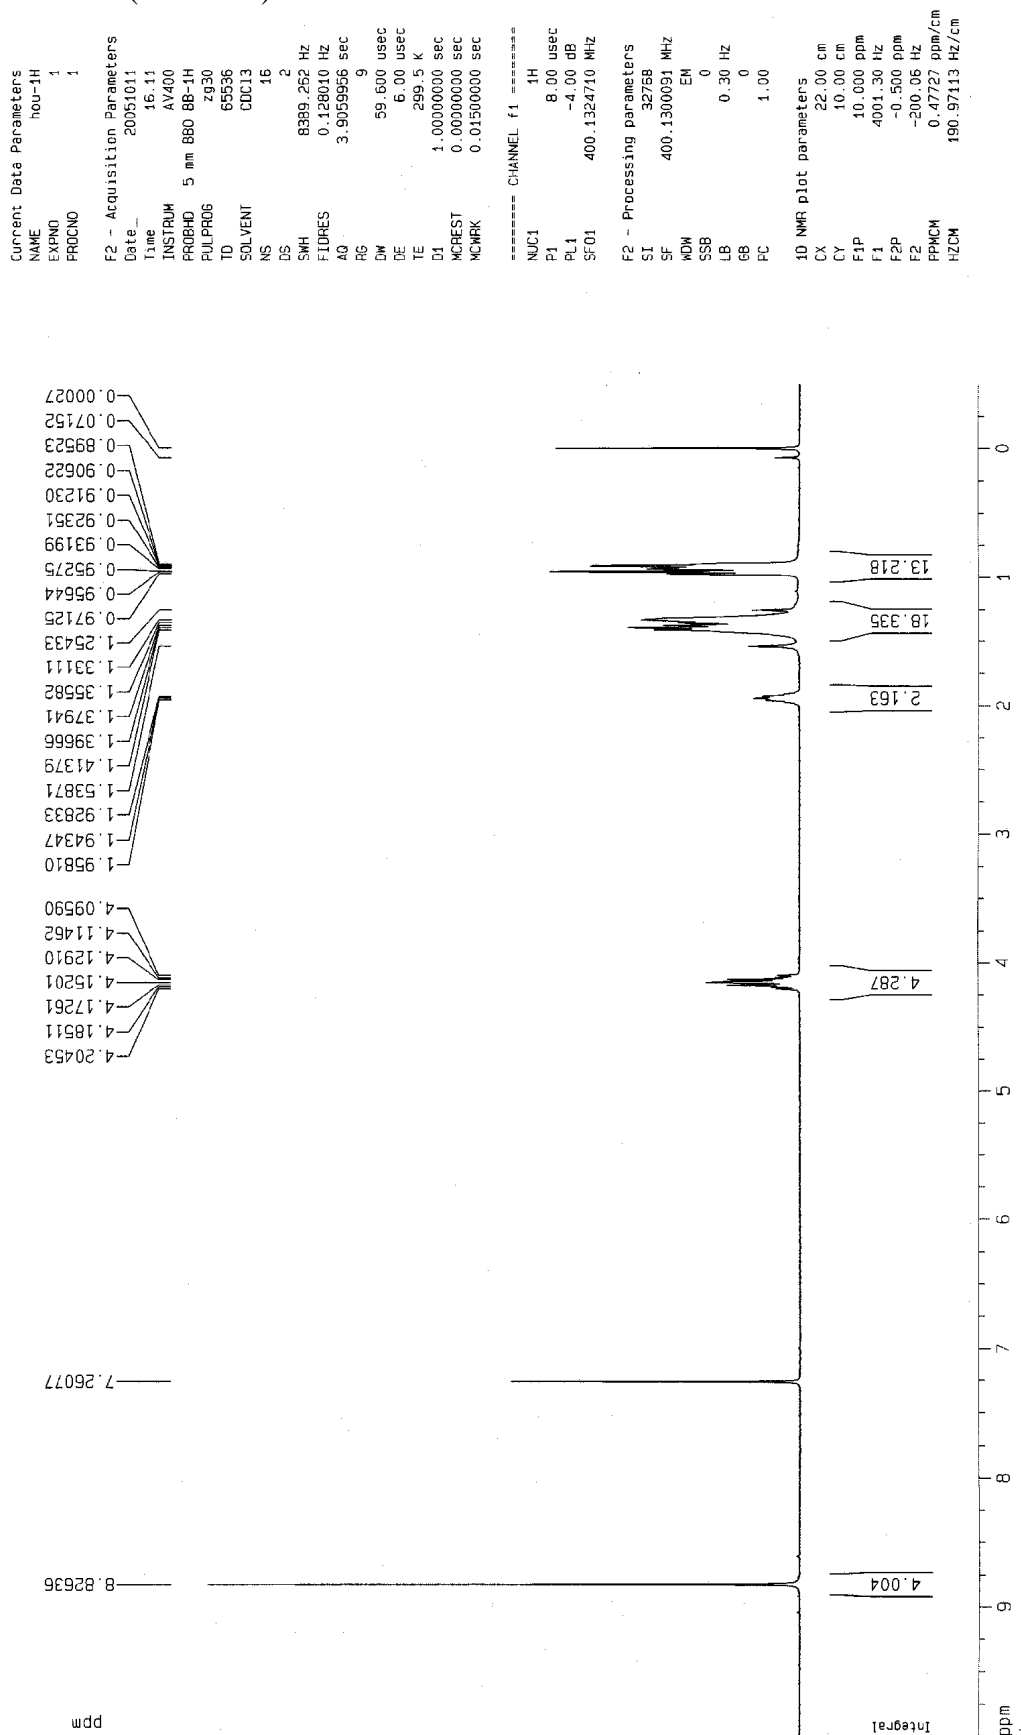

$^{13}\text{C}$  NMR of **3** (100 MHz)

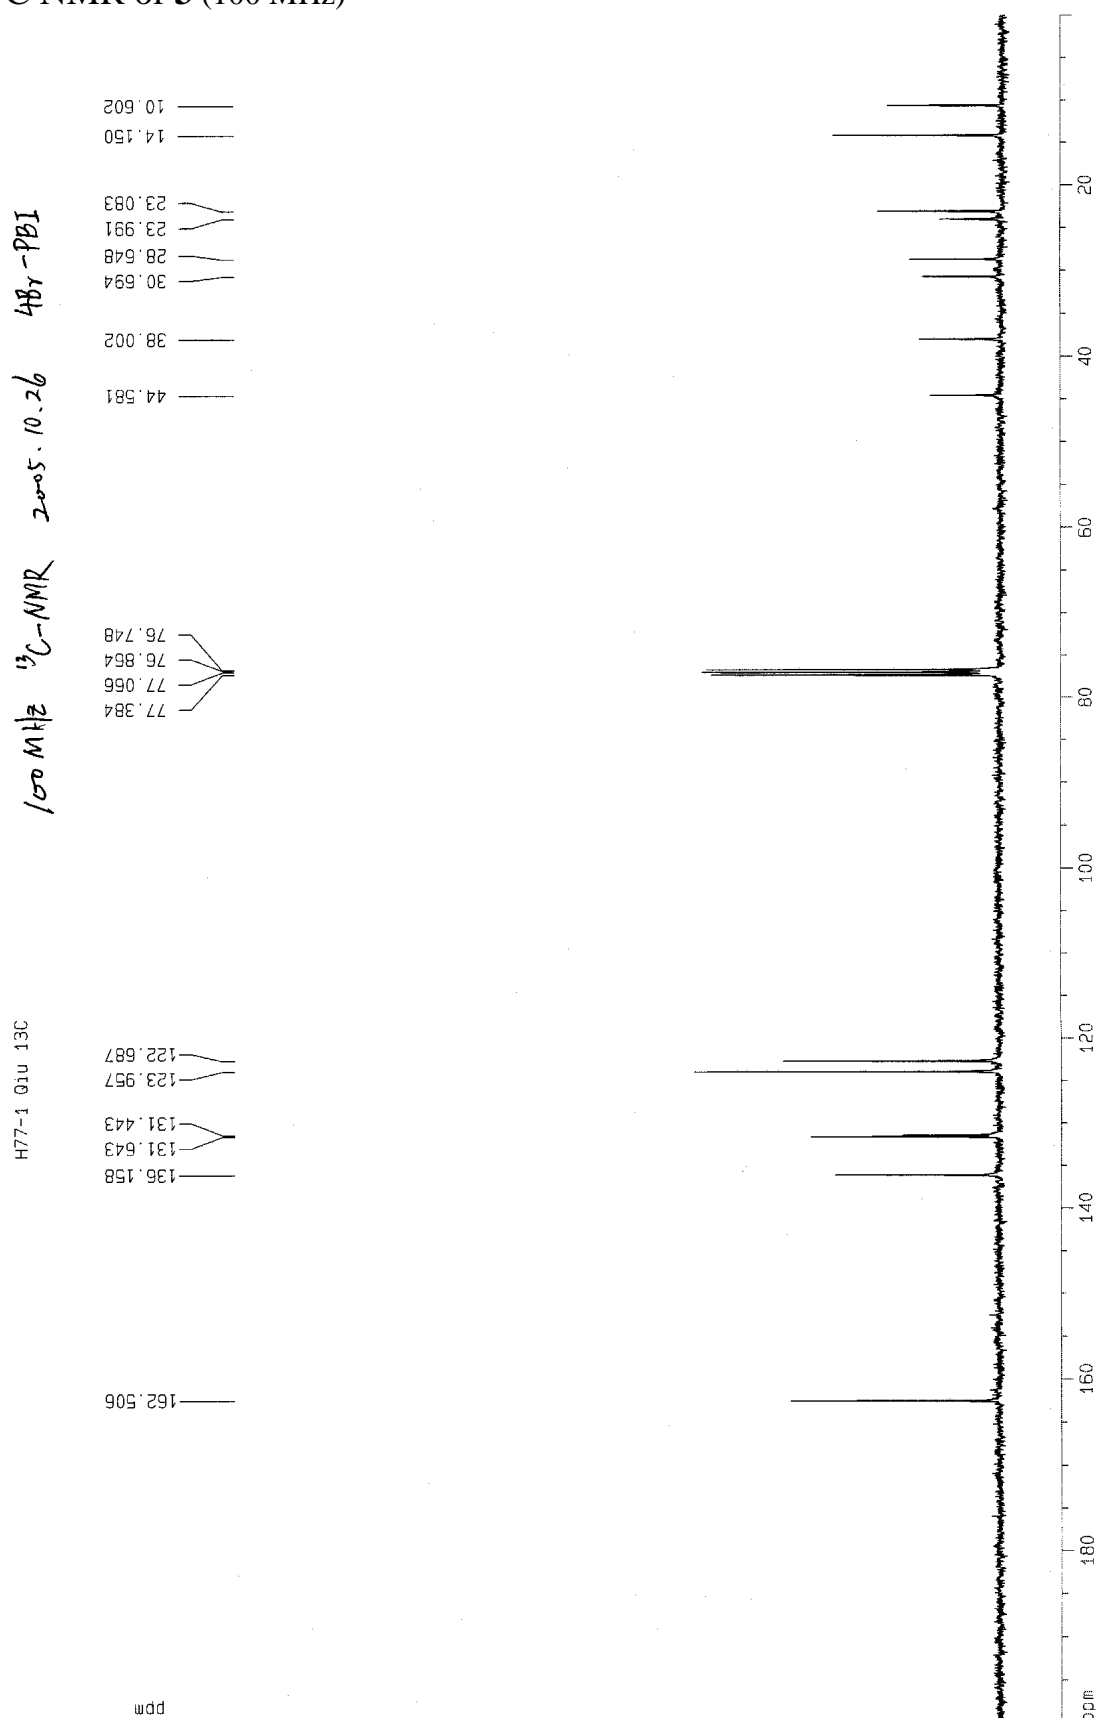

<sup>1</sup>H NMR H85-2 Qiu

<sup>1</sup>H NMR of 4 (300 MHz)

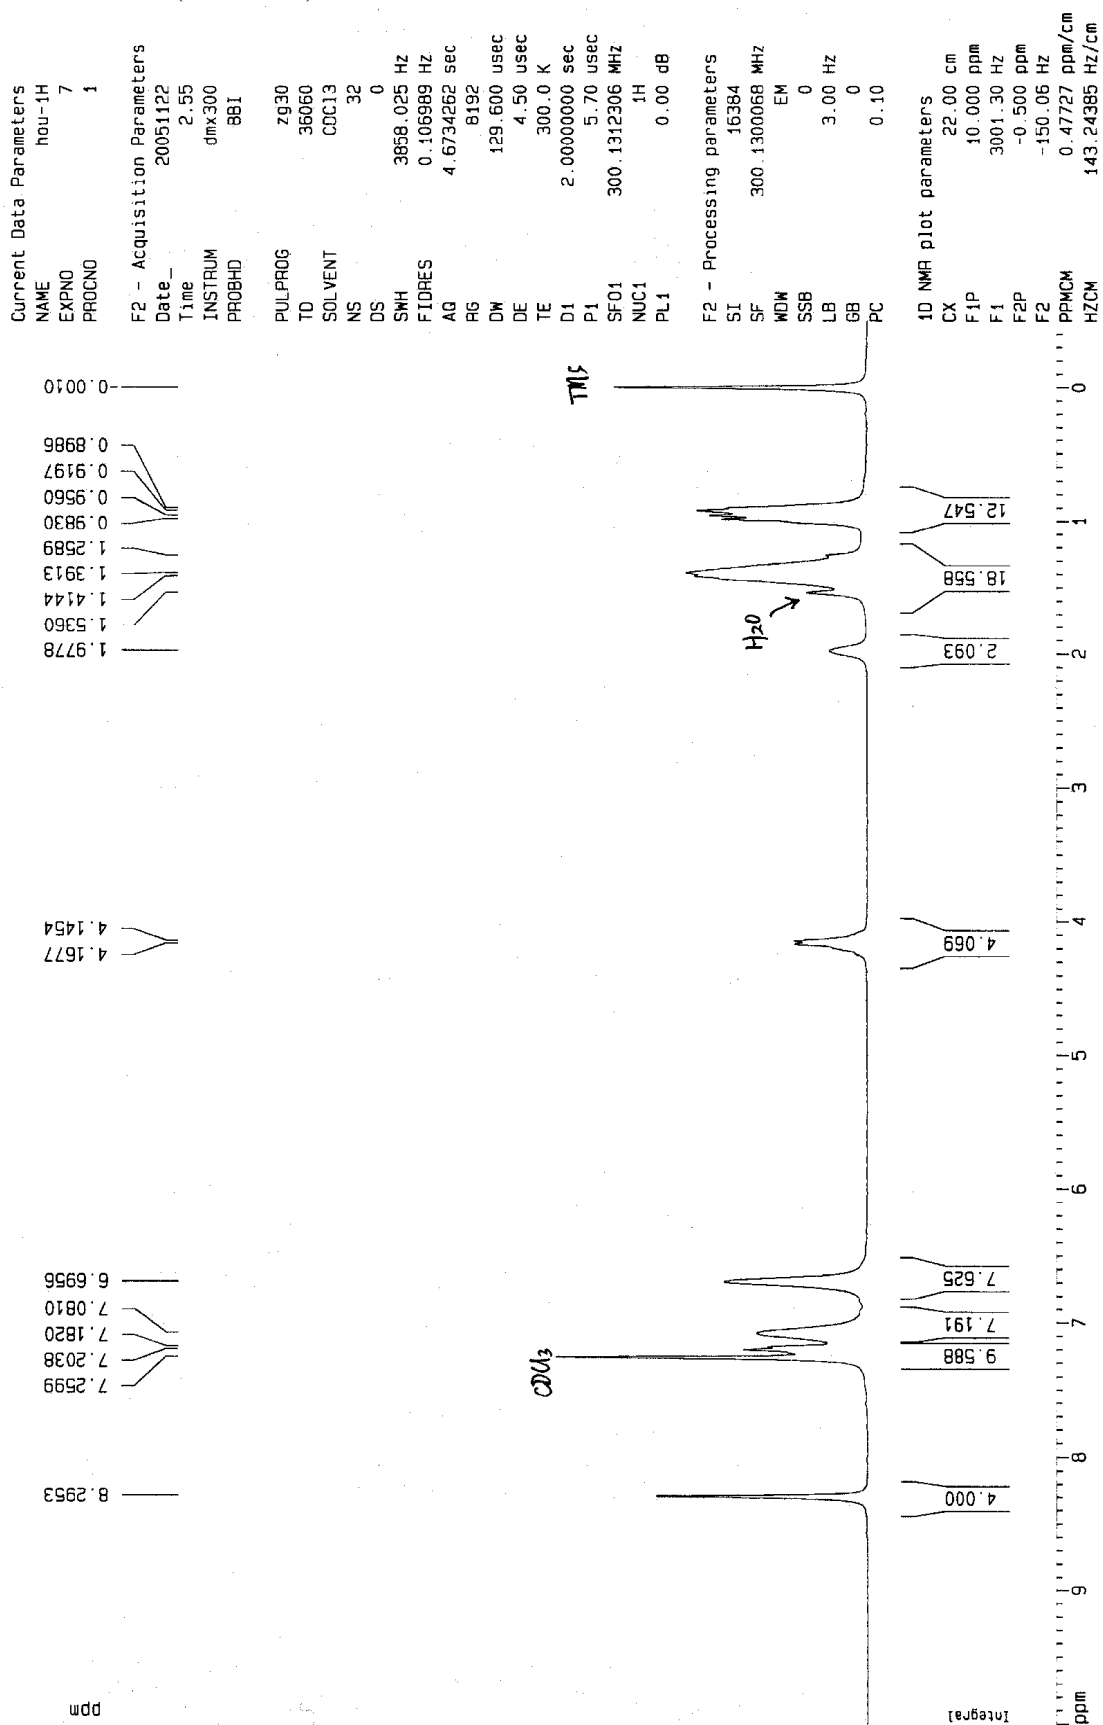



<sup>13</sup>C NMR of **4** (75 MHz)

Current Data Parameters  
 NAME hou-13C  
 EXPNO 7  
 PROCNO 1

F2 - Acquisition Parameters  
 Date\_ 20051122  
 Time 3.20  
 INSTRUM dm3300  
 PROBHD BBI

PULPROG zgpg  
 TD 32768  
 SOLVENT CDC13  
 NS 870  
 DS 2  
 SWH 18939.395 Hz  
 FIDRES 0.577984 Hz  
 AQ 0.8651252 sec  
 RG 32768  
 DW 26.400 usec  
 DE 4.50 usec  
 TE 300.0 K  
 d11 0.03000000 sec  
 PL12 28.00 dB  
 CPDPRG2 waltz16  
 PCPD2 100.00 usec  
 SF02 300.1310035 MHz  
 NUC2 <sup>1</sup>H  
 PL2 0.00 dB  
 D1 2.00000000 sec  
 P1 14.00 usec  
 SF01 75.4752658 MHz  
 NUC1 <sup>13</sup>C  
 PL1 -3.00 dB

F2 - Processing parameters  
 SI 8192  
 SF 75.4677129 MHz  
 WDW EM  
 SSB 0  
 LB 3.00 Hz  
 GB 0  
 PC 0.10

1D NMR plot parameters  
 CX 21.50 cm  
 F1P 200.000 ppm  
 F1 15093.54 Hz  
 F2P 0.000 ppm  
 F2 0.00 Hz  
 PPMCM 9.30233 ppm/cm  
 HZCM 702.02521 Hz/cm

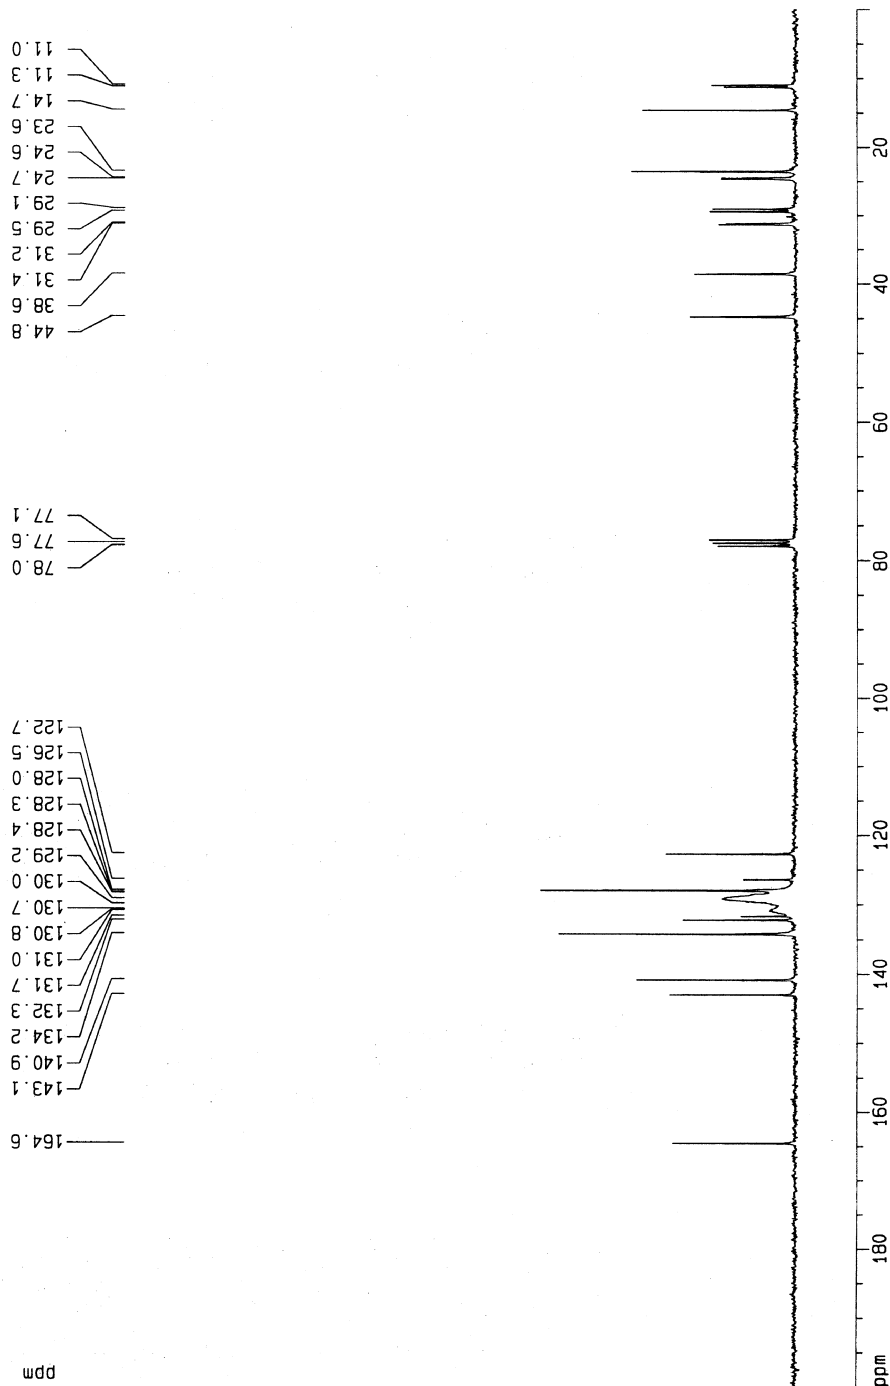

<sup>13</sup>C NMR of **4** (75 MHz, 110 ppm – 180 ppm)

2005.11.23 13C NMR H85-2 Qiu

Current Data Parameters  
 NAME hou-13C  
 EXPNO 7  
 PROCNO 1

F2 - Acquisition Parameters  
 Date\_ 20051122  
 Time 3:20  
 INSTRUM dm3300  
 PROBHD BBI

PULPROG zgpgc  
 TD 32768  
 SOLVENT CDCl3  
 NS 870  
 DS 2  
 SWH 18939.395 Hz  
 FIDRES 0.577984 Hz  
 AQ 0.8651252 sec  
 RG 32768  
 DW 26.400 usec  
 DE 4.50 usec  
 TE 300.0 K  
 d11 0.03000000 sec  
 PL12 28.00 dB  
 CPDPRG2 waltz16  
 PCPD2 100.00 usec  
 SF02 300.1310035 MHz  
 NUC2 1H  
 PL2 0.00 dB  
 D1 2.00000000 sec  
 P1 14.00 usec  
 SF01 75.4752658 MHz  
 NUC1 13C  
 PL1 -3.00 dB

F2 - Processing parameters  
 SI 8192  
 SF 75.4677129 MHz  
 WDW EM  
 SSB 0  
 LB 3.00 Hz  
 GB 0  
 PC 0.10

1D NMR plot parameters  
 CX 21.50 cm  
 F1P 180.000 ppm  
 F1 13584.19 Hz  
 F2P 110.000 ppm  
 F2 8301.45 Hz  
 PPMCM 3.25581 ppm/cm  
 HZCM 245.70883 Hz/cm

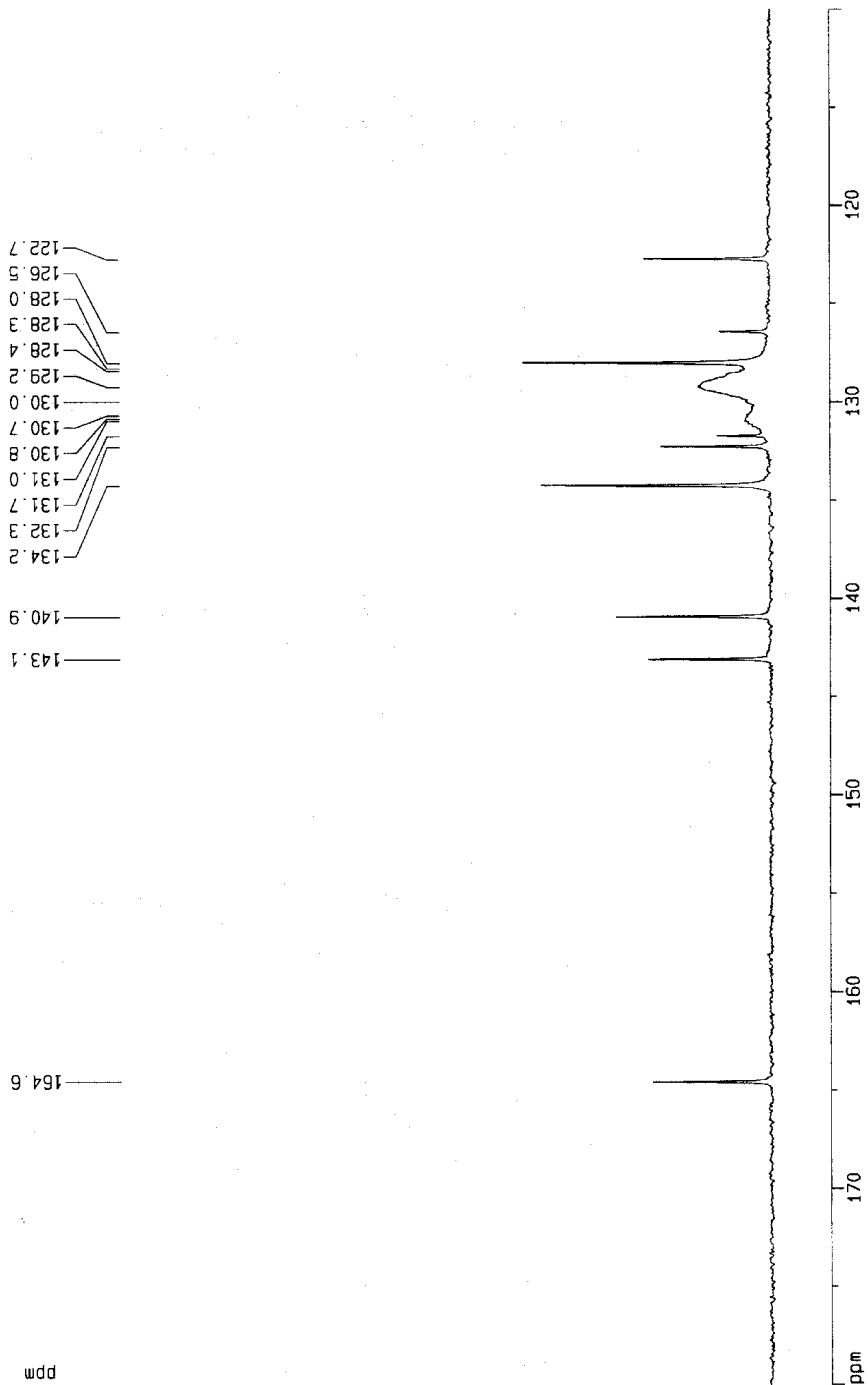

# <sup>1</sup>H NMR H85-3 Qiu

## <sup>1</sup>H NMR of **5** (300MHz)

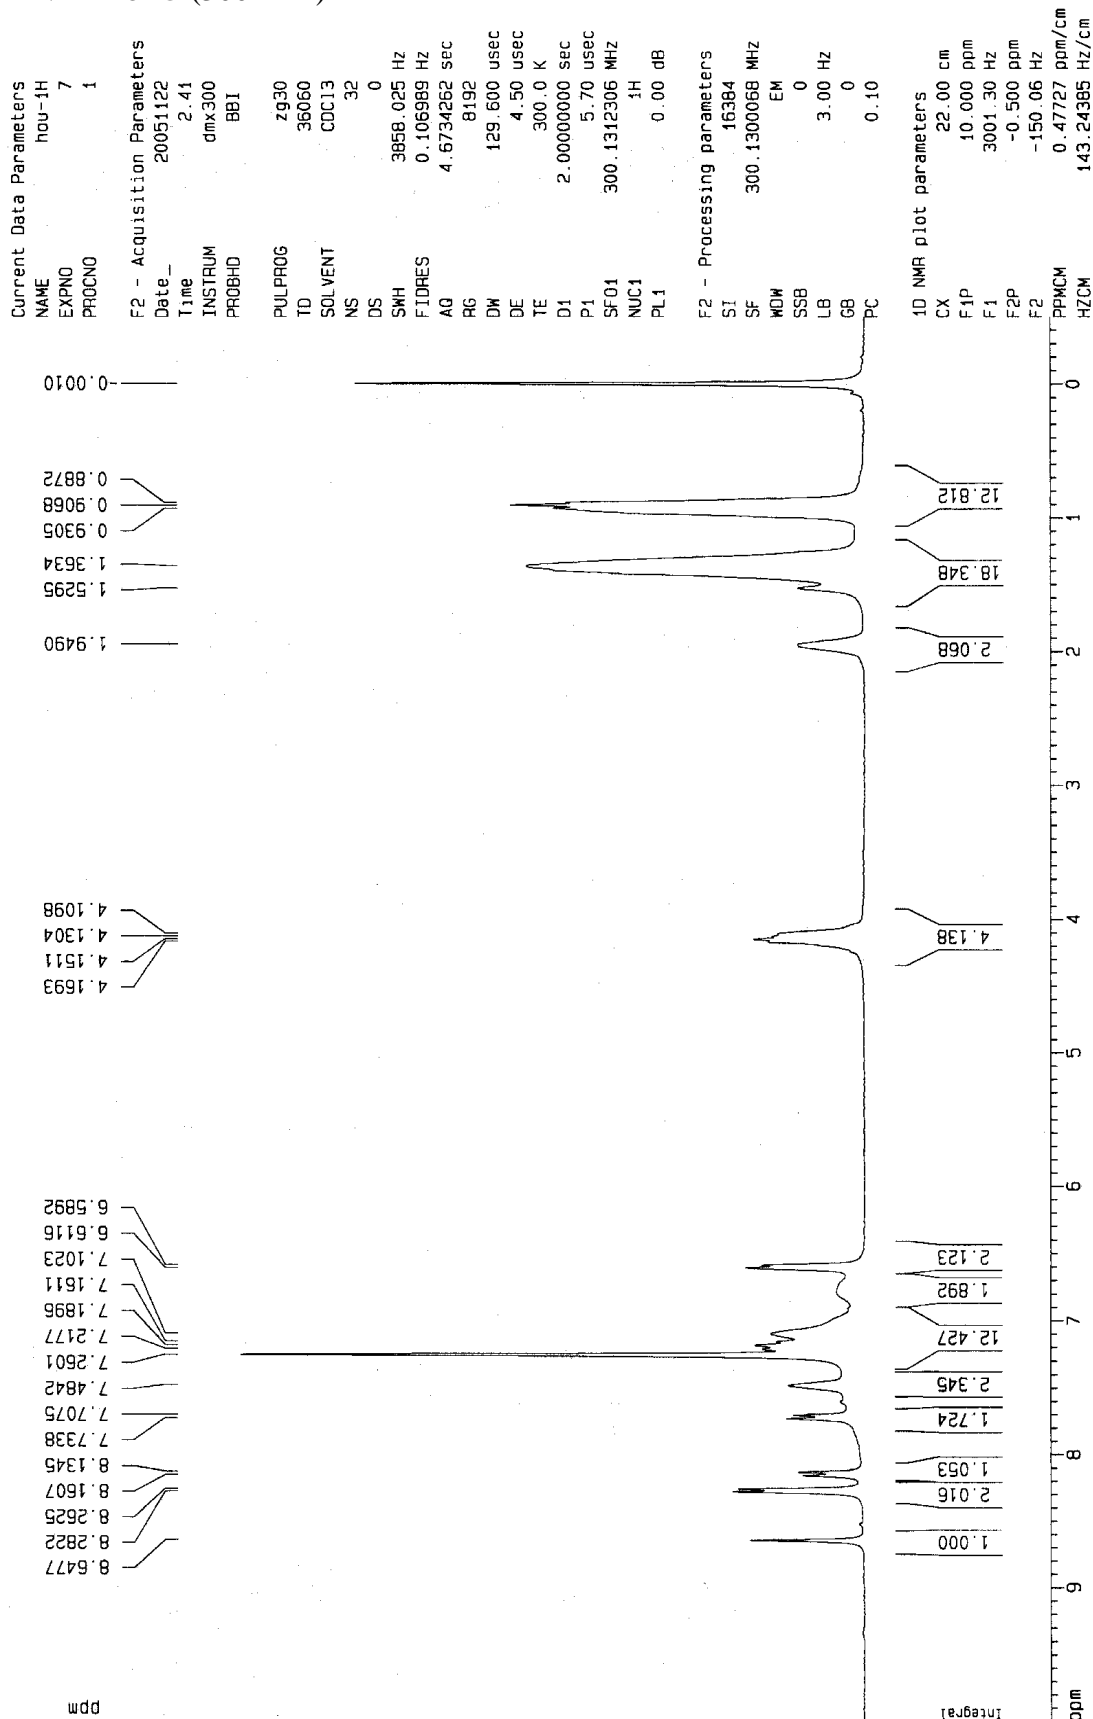

2005.11.23 13C NMR H85-3 Qiu

# <sup>13</sup>C NMR of **5** (75 MHz)

Current Data Parameters  
NAME hou-13C  
EXPNO 7  
PROCNO 1

F2 - Acquisition Parameters  
Date\_ 20051122  
Time 4.10  
INSTRUM dm3300  
PROBHD BBI

PULPROG zgpg  
TD 32768  
SOLVENT CDCl3  
NS 1217  
DS 2  
SWH 18939.395 Hz  
FIDRES 0.577984 Hz  
AQ 0.8651252 sec  
RG 32768  
DM 26.400 usec  
DE 4.50 usec  
TE 300.0 K  
d11 0.03000000 sec  
PL12 28.00 dB  
CPDPRG2 waltz16  
PCPD2 100.00 usec  
SF02 300.1310035 MHz  
NUC2 1H  
PL2 0.00 dB  
D1 2.00000000 sec  
P1 14.00 usec  
SF01 75.4752658 MHz  
NUC1 13C  
PL1 -3.00 dB

F2 - Processing parameters

SI 8192  
SF 75.4677129 MHz  
WDW EM  
SSB 0  
LB 3.00 Hz  
GB 0  
PC 0.10

1D NMR plot parameters  
CX 21.50 cm  
F1P 200.000 ppm  
F1 15093.54 Hz  
F2P 0.000 ppm  
F2 0.00 Hz  
PPMCM 9.30233 ppm/cm  
HZCM 702.02521 Hz/cm

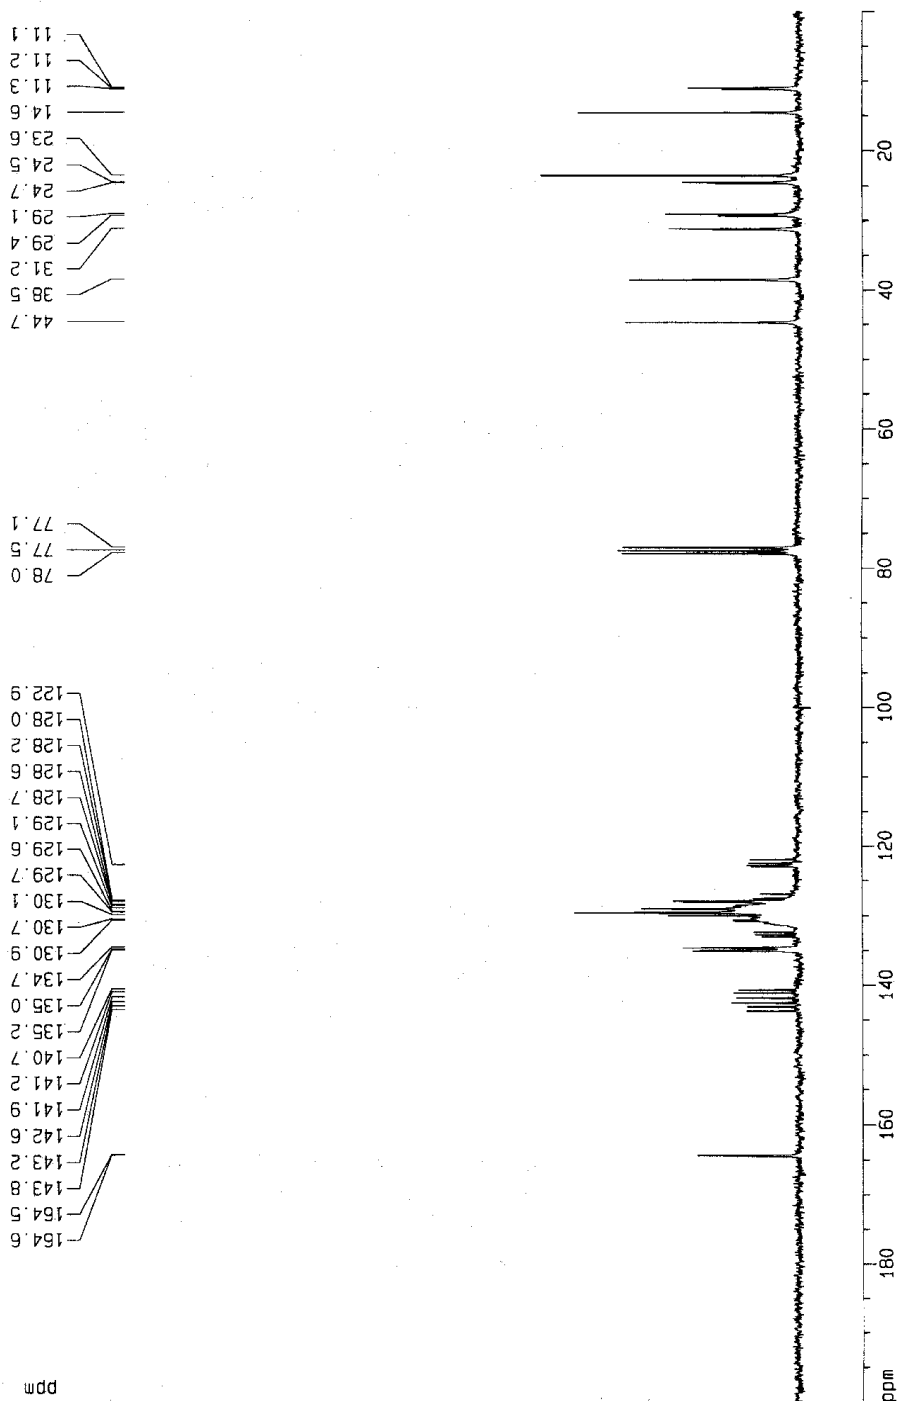

Supplement: Supplementary file 1 [file 5069455]
